# Supplementary material
Source: PubMed Central journal article supplement (PMC7324208)
Supplement: jci-130-128310-s142.pdf [file jci-130-128310-s142.pdf]

# **Notch signaling licenses allergic airway inflammation by promoting Th2 cell lymph node egress**

Irma Tindemans<sup>1</sup>, Anne van Schoonhoven<sup>1,2</sup>, Alex KleinJan<sup>1</sup>, Marjolein J.W. de Bruijn<sup>1</sup>, Melanie Lukkes<sup>1</sup>, Menno van Nimwegen<sup>1</sup>, Anouk van den Branden<sup>1</sup>, Ingrid M. Bergen<sup>1</sup>, Odilia B.J. Corneth<sup>1</sup>, Wilfred F.J. van IJcken<sup>3</sup>, Ralph Stadhouders<sup>1,2\*\*</sup> and Rudi W. Hendriks<sup>1\*\*</sup>

(1) Department of Pulmonary Medicine, Erasmus MC Rotterdam, the Netherlands

(2) Department of Cell Biology, Erasmus MC Rotterdam, the Netherlands

(3) Center for Biomixis, Erasmus MC Rotterdam, the Netherlands

\* Shared senior authorship

# Corresponding author

Correspondence to:

Ralph Stadhouders & Rudi W. Hendriks

Department of Pulmonary Medicine, Erasmus MC Rotterdam

PO Box 2040, 3000 CA Rotterdam, the Netherlands

e-mail: [r.stadhouders@erasmusmc.nl](mailto:r.stadhouders@erasmusmc.nl) & [r.hendriks@erasmusmc.nl](mailto:r.hendriks@erasmusmc.nl)

phone: ++31-10-7043700

## **Supplemental data:**

**- 6 Supplemental Figures**

**- 2 Supplemental Tables**

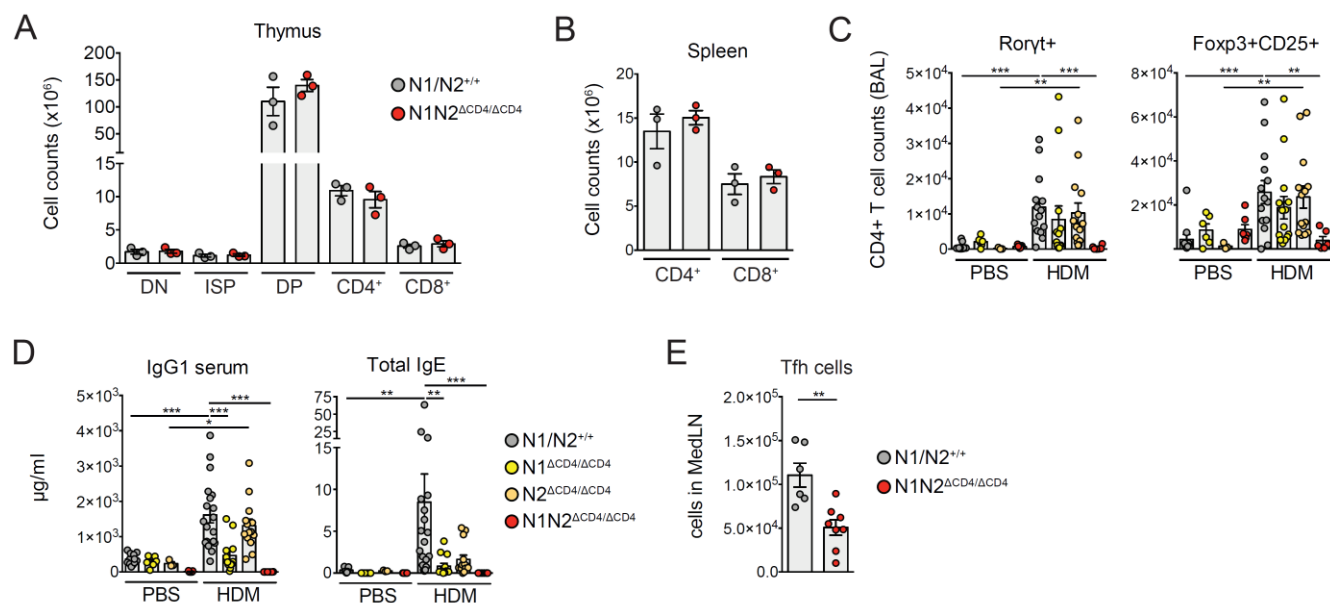

**Supplemental Figure 1. Notch signaling in CD4<sup>+</sup> T cells does not affect T cell development, but is required for AAI induction.** (A) Numbers of total cells in each thymocyte subpopulation in WT and N1N2 $\Delta$ CD4/ΔCD4 mice, as determined by flow cytometry; DN, CD3<sup>-</sup>CD4<sup>-</sup>CD8<sup>-</sup> double negative cells; ISP, CD3<sup>-</sup>CD4<sup>-</sup>CD8<sup>+</sup> immature single positive cells; DP, CD3<sup>+</sup>CD4<sup>+</sup> double positive cells, CD4<sup>+</sup>, CD4<sup>+</sup>CD8<sup>-</sup> CD3<sup>+</sup> T cells; CD8<sup>+</sup>, CD4<sup>-</sup>CD8<sup>+</sup> CD3<sup>+</sup> T cells. (B) Quantification of the total numbers of CD4<sup>+</sup> and CD8<sup>+</sup> T cells in the spleens of WT and N1N2 $\Delta$ CD4/ΔCD4 mice. (C) Quantification of Rorγt<sup>+</sup>CD4<sup>+</sup> Th17 cells and Foxp3<sup>+</sup>CD25<sup>+</sup> regulatory T cells in the BAL fluid of mice subjected to an acute HDM-driven AAI protocol (see Figure 1A). (D) Concentrations of total IgG1 and IgE in the serum of mice subjected to an acute HDM-driven AAI protocol, as determined by ELISA. (E) Number of PD1<sup>+</sup>CXCR5<sup>+</sup> follicular T helper (Tfh) cells in the MedLN of WT and N1N2 $\Delta$ CD4/ΔCD4 mice subjected to an acute HDM-driven AAI protocol. Data are shown as individual values, together with the mean  $\pm$  SEM from 3 (panels A-B) or 6-8 mice per group (panels C-E). \* $p$ <0.05, \*\* $p$ <0.01, \*\*\* $p$ <0.001, Kruskal-Wallis test (panel A-D) or Mann-Whitney U-test (panel E).

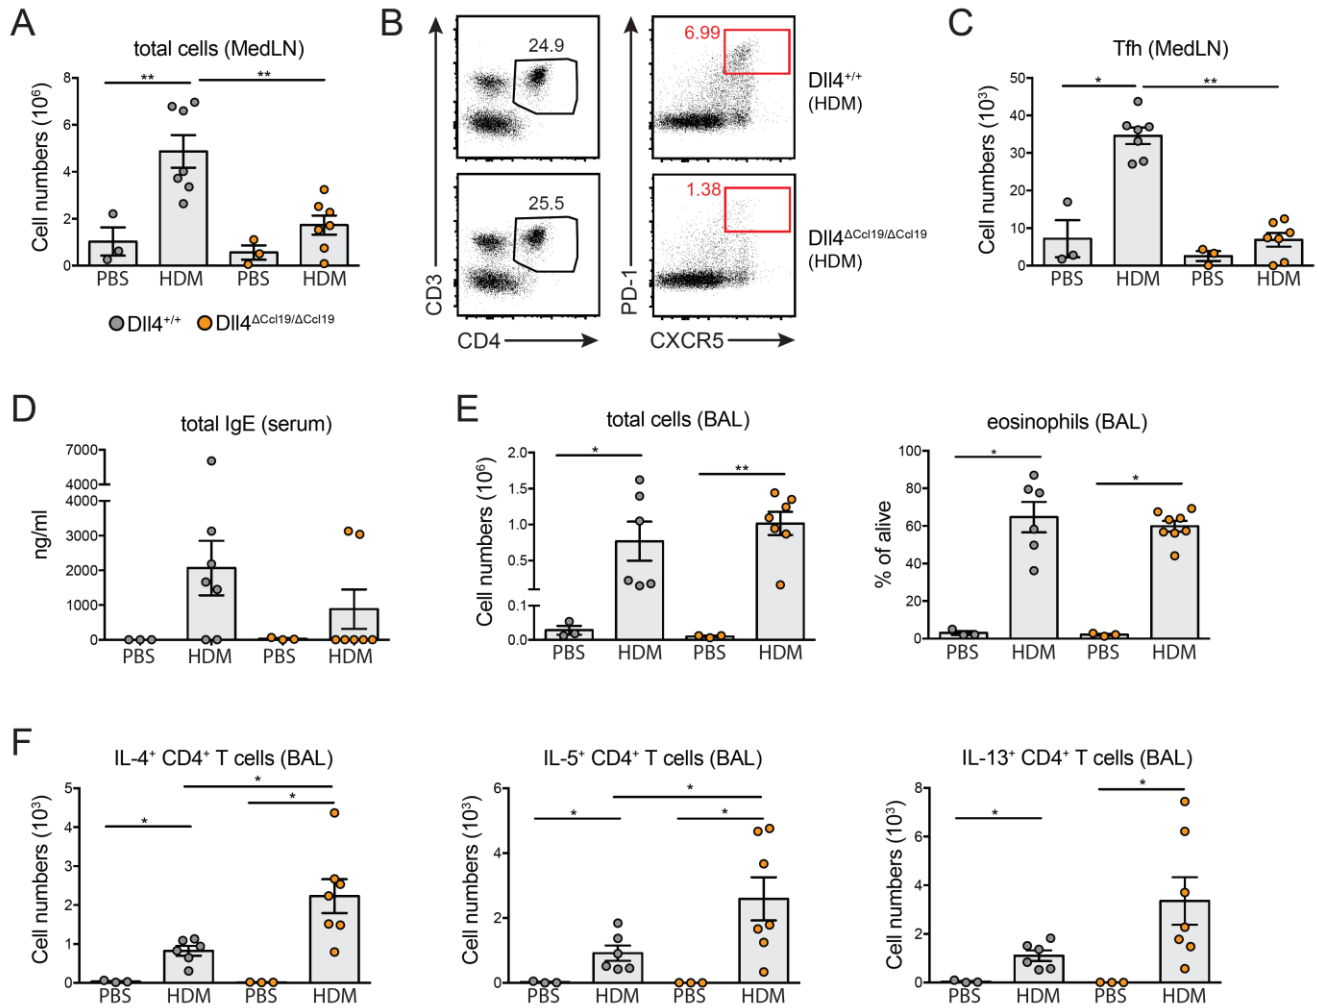

**Supplemental Figure 2. DLL4 expression on CCL19<sup>+</sup> MedLN fibroblastic reticular cells is required for Tfh formation and IgE induction, but not for eosinophilia in an acute HDM-driven AAI model.**

(A) Total numbers of MedLN cells in DII4<sup>ΔCcl19/ΔCcl19</sup> and DII4<sup>+/+</sup> WT mice in acute HDM-driven AAI, according to the protocol depicted in Figure 1A. (B-C) Flow cytometry gating (B) and quantification (C) of the numbers of CD3<sup>+</sup>CD4<sup>+</sup>PD-1<sup>+</sup>CXCR5<sup>+</sup> follicular T helper (Tfh) cells in MedLN of PBS or HDM-sensitized DII4<sup>+/+</sup> and DII4<sup>ΔCcl19/ΔCcl19</sup> mice. (D) Serum IgE levels as determined by ELISA of the indicated genotypes. (E) Numbers of total cells and FSC<sup>int</sup>SSC<sup>high</sup>Siglec-F<sup>+</sup> eosinophils in BAL fluid of PBS or HDM-sensitized DII4<sup>+/+</sup> and DII4<sup>ΔCcl19/ΔCcl19</sup> mice. (F) Numbers of CD4<sup>+</sup> T cells positive for the indicated cytokines by intracellular flow cytometry in BAL fluid of PBS or HDM-sensitized DII4<sup>+/+</sup> and DII4<sup>ΔCcl19/ΔCcl19</sup> mice. Data are shown as individual values, together with the mean ± SEM from 3-7 mice per group. \*p<0.05, \*\*p<0.01; Kruskal-Wallis test.

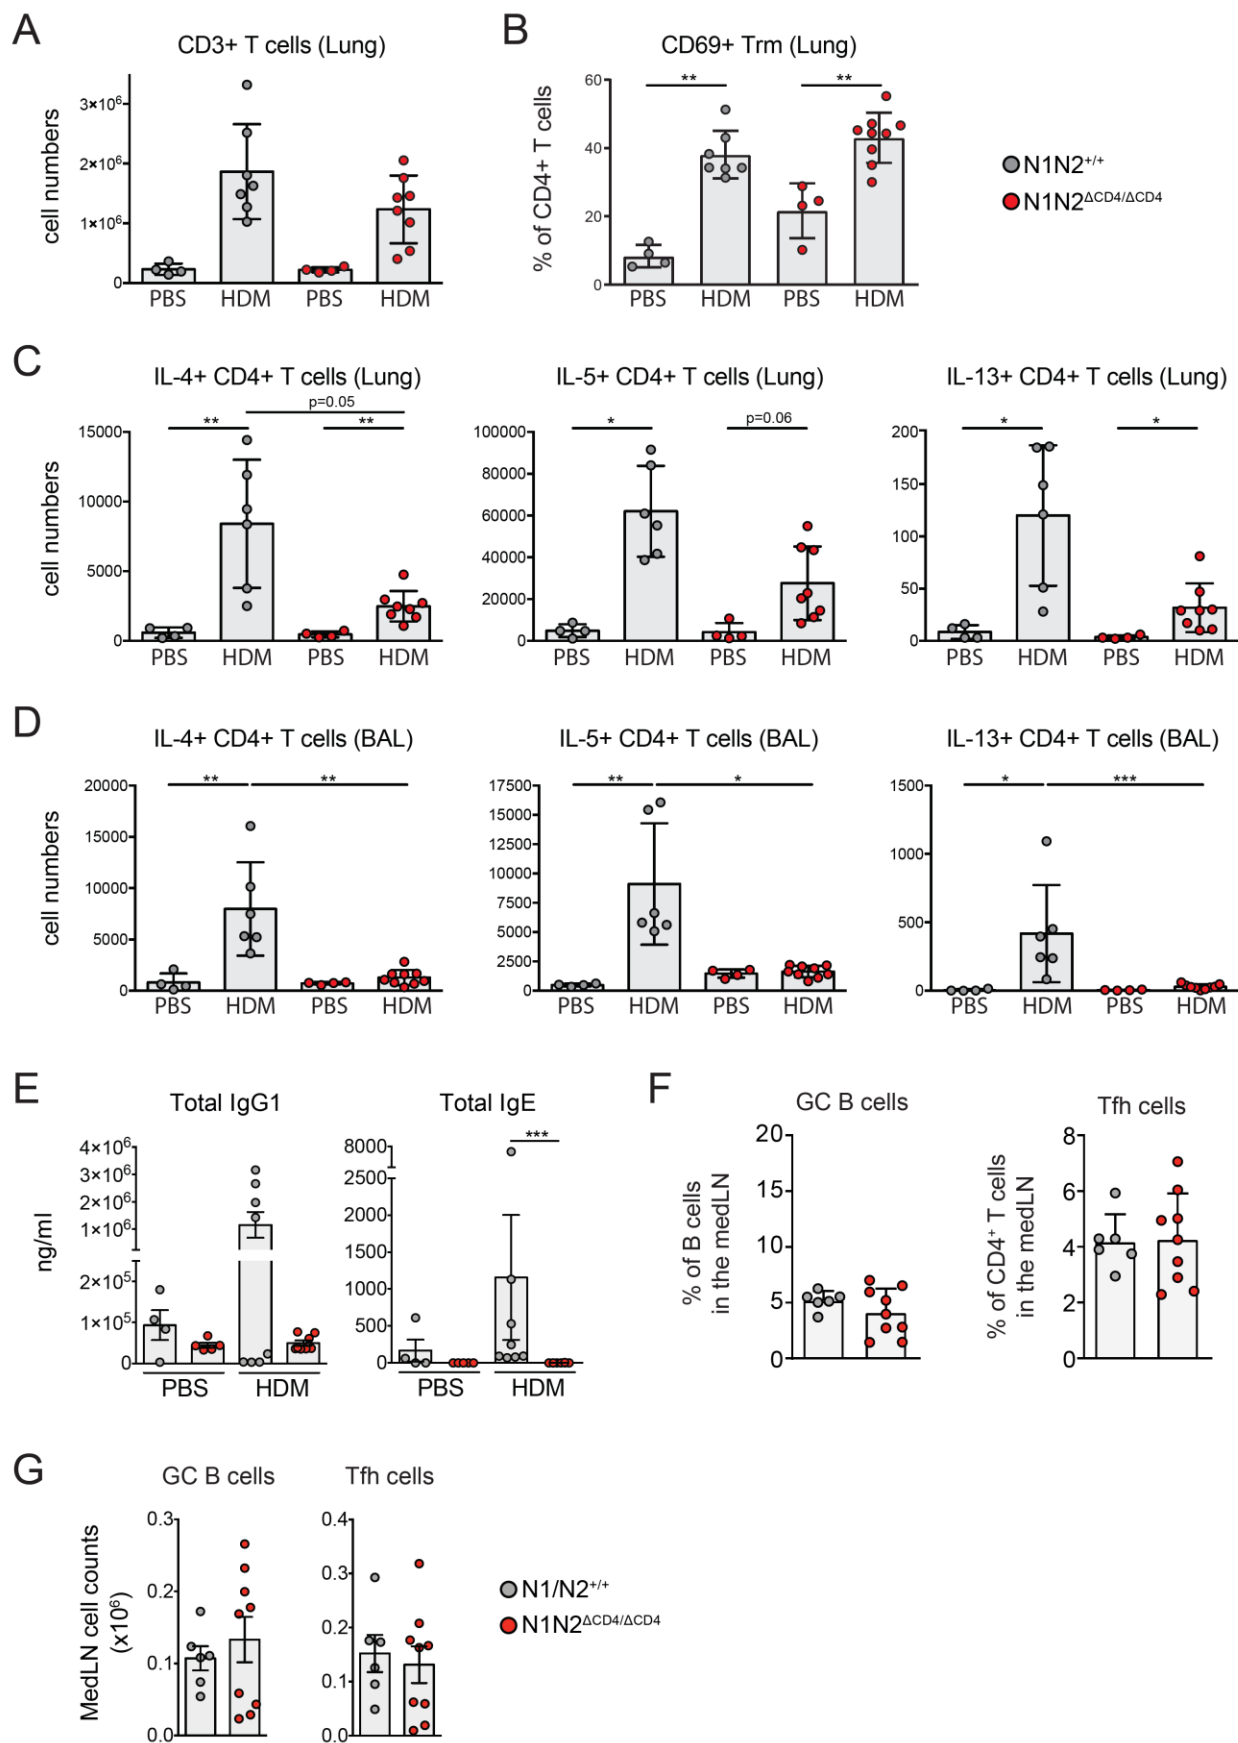

**Supplemental Figure 3. Cytokine production by lung CD4<sup>+</sup> T cells and IgE induction in HDM-driven AAI is dependent on Notch signaling.** (A-B) Numbers of total CD3<sup>+</sup> T cells (A) and the proportions of CD69<sup>+</sup> resident memory T (Trm) cells (B) in the lungs of PBS or HDM-sensitized mice of WT and N1N2<sup>ΔCD4/ΔCD4</sup> mice subjected to chronic HDM-driven AAI, according to the protocol depicted in **Figure 2A**. (C-D) Numbers of CD4<sup>+</sup> T cells positive for the indicated cytokines by intracellular flow cytometry in lung (C) or BAL fluid (D) of PBS or HDM-sensitized mice of the indicated genotype. (E) Total IgG1 and IgE levels as determined by ELISA in serum of PBS or HDM-sensitized WT and N1N2<sup>ΔCD4/ΔCD4</sup> mice subjected to chronic HDM-driven AAI, according to the protocol depicted in Figure 2A. (F-G) Numbers (panel F) and proportions (panel G) of GL7<sup>+</sup>CD95<sup>+</sup>IgD<sup>-</sup> GC B cells (*left*) and follicular T helper (Tfh) cells in the MedLN of mice of the indicated genotype. Data are shown as individual values, together with the mean ± SEM of 4-9 mice per group. \*p<0.05, \*\*p<0.01; Kruskal-Wallis test (panel A-E) or Mann-Whitney U-test (panel F-G).

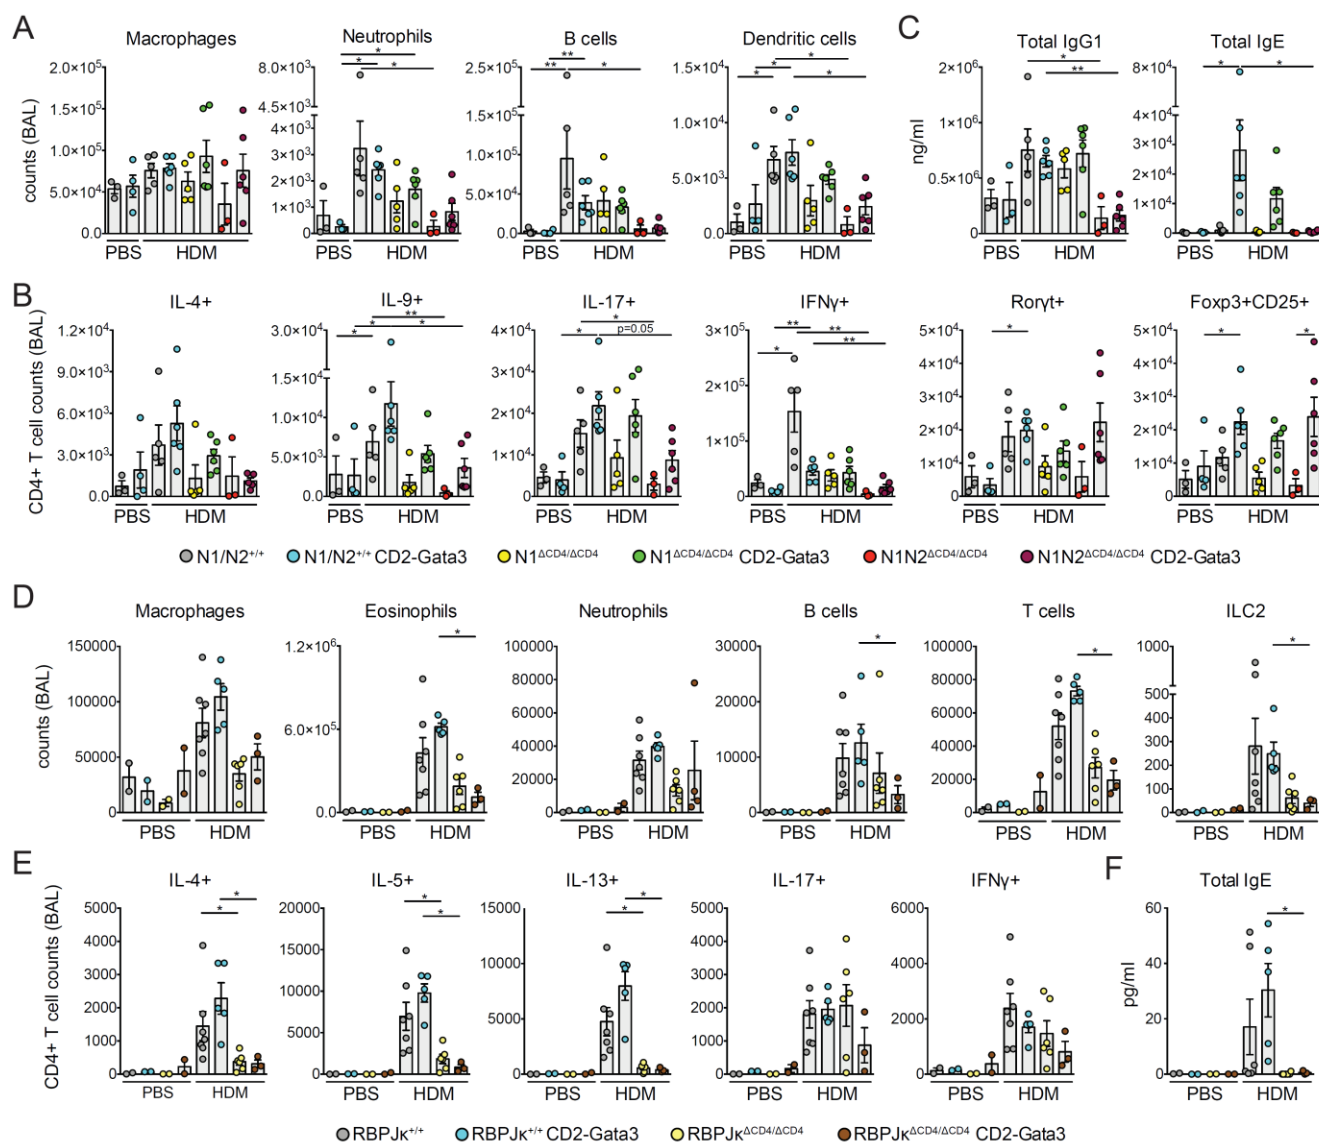

**Supplemental Figure 4. Limited rescue of AAI in Notch-deficient mice by enforced Gata3 expression.** (A) Numbers of macrophages (FSC<sup>high</sup>SSC<sup>high</sup>CD11c<sup>+</sup>Siglec-F<sup>+</sup> autofluorescent cells), neutrophils (Ly-6G<sup>+</sup> cells), B cells (CD19<sup>+</sup> cells) and DCs (CD11c<sup>+</sup>MHCII<sup>hi</sup> cells) in BAL fluid of PBS or HDM-sensitized mice challenged with HDM as indicated in Figure 1A. (B) Absolute numbers of cytokine-expressing CD3<sup>+</sup>CD4<sup>+</sup> T cells, Ror $\gamma$ t<sup>+</sup>CD4<sup>+</sup> Th17 cells and Foxp3<sup>+</sup>CD25<sup>+</sup> regulatory T cells in the BAL fluid of the indicated PBS or HDM-sensitized mice. (C) Concentrations of total IgG1 and IgE in the serum of mice subjected to an acute HDM-driven AAI protocol, as determined by ELISA. (D) Numbers FSC<sup>high</sup>SSC<sup>high</sup>CD11c<sup>+</sup>Siglec-F<sup>+</sup> autofluorescent macrophages, FSC<sup>int</sup>SSC<sup>high</sup>Siglec-F<sup>+</sup> eosinophils, Ly-6G<sup>+</sup> neutrophils, CD19<sup>+</sup> B cells, CD3<sup>+</sup> T cells and Lineage<sup>IL-7R<sup>+</sup>T1ST2<sup>+</sup></sup> type 2 innate lymphoid cells (ILC2) in BAL fluid from four groups of PBS- or HDM-sensitized WT or RBPJ $\kappa$ -deficient mice. (E)

Absolute numbers of cytokine-expressing CD3<sup>+</sup>CD4<sup>+</sup> T cells in the BAL fluid of PBS or HDM-sensitized mice. **(F)** Concentrations of total IgE in the serum of indicated mice subjected to an acute HDM-driven AAI protocol, as determined by ELISA. Data are shown as individual values, together with the mean values  $\pm$  SEM of 3-7 mice per group and are representative of 3 independent experiments. \* $p < 0.05$ , \*\* $p < 0.01$ ; Kruskal-Wallis test.

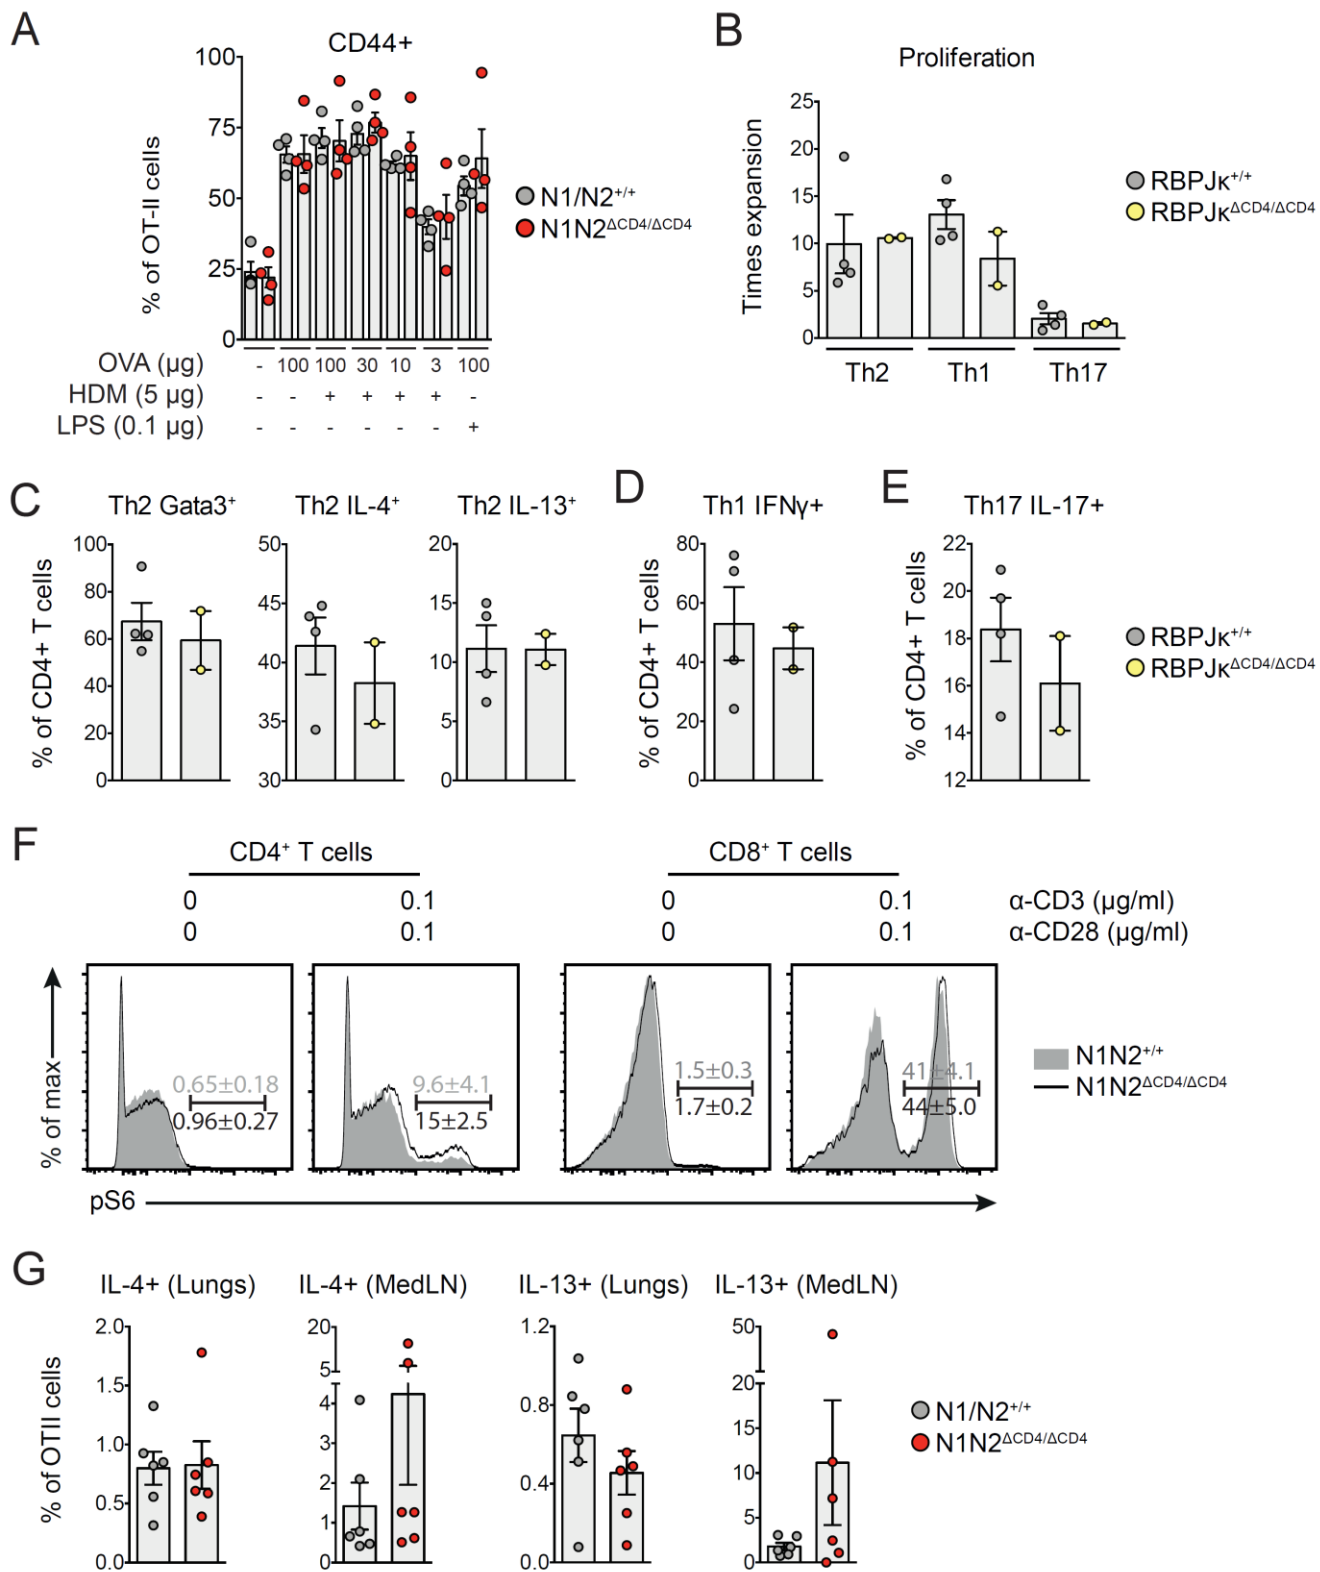

**Supplemental Figure 5. Notch signaling is not required for in vitro proliferation and differentiation of CD4<sup>+</sup> T cells.** (A) Proportions of splenic WT and N1/N2 $\Delta$ CD4/ $\Delta$ CD4 CD4<sup>+</sup> T cells

expressing surface CD44 upon in vitro activation with the indicated stimuli. **(B)** In vitro expansion of purified splenic WT and RBPJ $\kappa^{\Delta CD4/\Delta CD4}$  CD4<sup>+</sup> T cells activated with anti-CD3 and anti-CD28 antibodies and cultured under Th1, Th2 and Th17-polarizing conditions. Total numbers of cells at the start of the culture were set to 1. **(C)** Proportions of Gata3 and Th2 cytokine positive CD4<sup>+</sup> T cells within in vitro polarized Th2 cultures from WT and RBPJ $\kappa^{\Delta CD4/\Delta CD4}$  mice, as determined by flow cytometry. **(D)** Proportions of IFN $\gamma$  CD4<sup>+</sup> T cells from in vitro polarized Th1 cultures from WT and RBPJ $\kappa^{\Delta CD4/\Delta CD4}$  mice. **(E)** Proportions of IL-17<sup>+</sup> CD4<sup>+</sup> T cells from in vitro polarized Th17 cultures from WT and RBPJ $\kappa^{\Delta CD4/\Delta CD4}$  mice. **(F)** Total spleen cells from WT and N1N2 $\Delta CD4/\Delta CD4$  mice were stimulated with the indicated concentrations of  $\alpha$ -CD3 and  $\alpha$ -CD28 for 3 hours, after which phosphorylation of the ribosomal protein S6 in CD4<sup>+</sup> and CD8<sup>+</sup> T cells was measured using flow cytometry. **(G)** Percentages of IL-4<sup>+</sup> and IL-13<sup>+</sup> OTII CD4<sup>+</sup> T cells in the lung and MedLN of mice that received in vitro Th2-polarized OTII CD4<sup>+</sup> T cells that were either WT or N1N2 $\Delta CD4/\Delta CD4$ , as determined by flow cytometry. Data are shown as individual values, together with the mean values  $\pm$  SEM of 2-6 mice per group and are representative of two independent experiments.

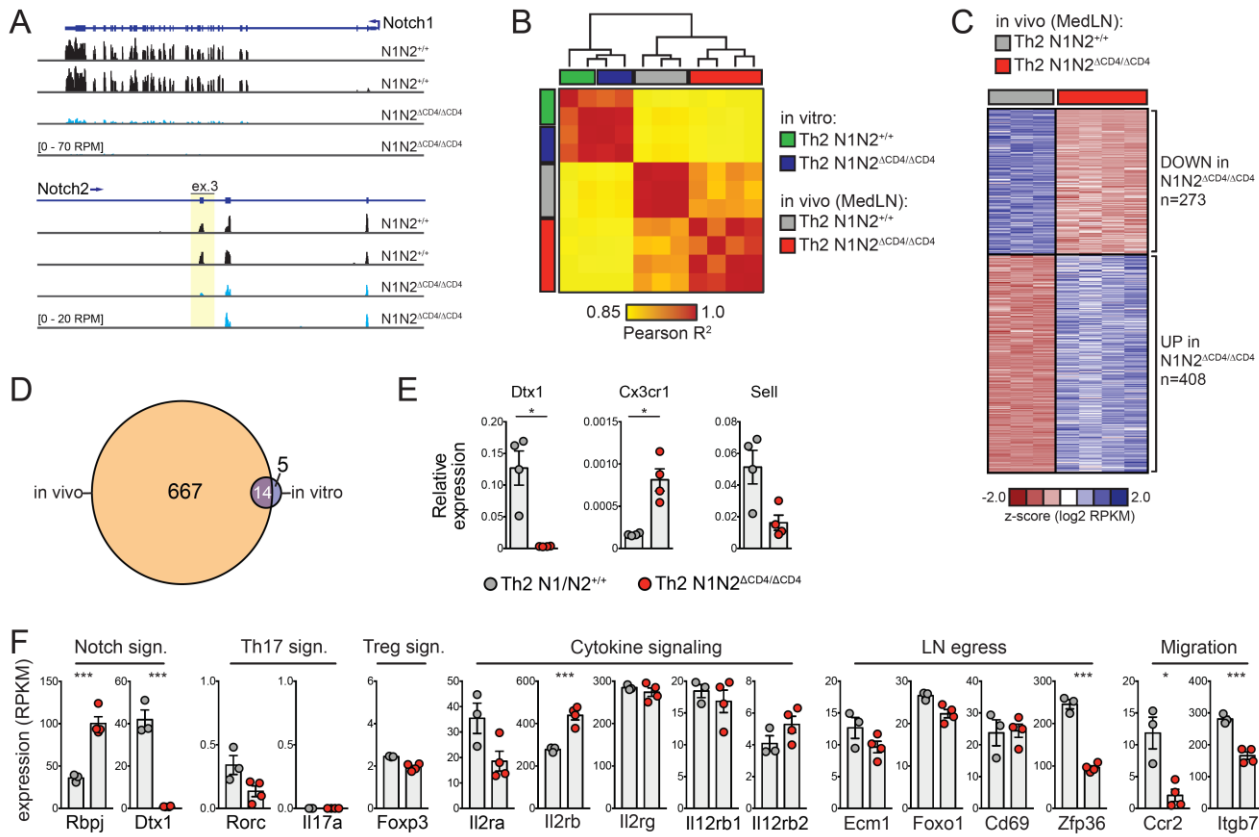

### Supplemental Figure 6. Transcriptional deregulation in Th2 cells due to Notch1/2 deficiency.

(A) IGV genome browser screenshots of RNA-Seq signals from WT (N1N2<sup>+/+</sup>) and Notch-deficient (N1N2<sup>ΔCD4/ΔCD4</sup>) OTII Th2 cells after in vitro polarization across the *Notch1* gene (top) and the *Notch2* floxed critical exon 3 (bottom). (B) Unsupervised hierarchical clustering of genome-wide RNA-Seq expression values from WT (N1N2<sup>+/+</sup>) and Notch-deficient (N1N2<sup>ΔCD4/ΔCD4</sup>) OTII Th2 cells after in vitro polarization or 5 days after in vivo transfer and OVA/HDM-treatment. Heatmap depicts correlation strength (Pearson R<sup>2</sup>) amongst the datasets. (C) Heatmap showing differentially expressed (DE) genes between WT and Notch-deficient Th2 cells from MedLN. (D) Venn diagram indicating the overlap in the sets of DE genes detected 'in vitro' (WT versus Notch-deficient Th2 cells directly after polarization in vitro) or 'in vivo' (WT versus Notch-deficient Th2 cells from the MedLN after in vivo transfer and OVA/HDM treatment). (E) Quantitative PCR validations of DE genes detected by RNA-Seq comparing WT and Notch-deficient Th2 cells from the MedLN. (F) Expression levels of selected genes; data are shown as individual values, together with the mean values ± SEM of 3-4 biological replicates. \*p<0.05, \*\*p<0.01, \*\*\*p<0.001, using a Mann-Whitney U-test (panel E) or adjusted DESeq2 p-values (panel F).

**Supplemental Table 1. Antibodies used in this study**

| <b>Target</b> | <b>Conjugate</b> | <b>Company</b> | <b>Clone</b> | <b>Application</b> |
|---------------|------------------|----------------|--------------|--------------------|
| <b>B220</b>   | APC              | BD Biosciences | RA3-6B2      | Flowcytometry      |
| <b>B220</b>   | PE               | eBioscience    | RA3-6B2      | Flowcytometry      |
| <b>CCR4</b>   | BV421            | Biolegend      | SA214G2      | Flowcytometry      |
| <b>CCR8</b>   | PE-Cy7           | Biolegend      | 2G12         | Flowcytometry      |
| <b>CD3</b>    | APC-ef780        | eBioscience    | 17A2         | Flowcytometry      |
| <b>CD3</b>    | BV421            | BD Biosciences | 145-2C11     | Flowcytometry      |
| <b>CD3</b>    | PE               | eBioscience    | 145-2C11     | Flowcytometry      |
| <b>CD3</b>    | PE-CF594         | BD biosciences | 145-2C11     | Flowcytometry      |
| <b>CD4</b>    | AF700            | eBioscience    | GK1.5        | Flowcytometry      |
| <b>CD4</b>    | APC-H7           | BD Biosciences | GK1,5        | Flowcytometry      |
| <b>CD4</b>    | BV605            | BD Biosciences | RM4-5        | Flowcytometry      |
| <b>CD4</b>    | BV711            | BD Biosciences | RM4-5        | Flowcytometry      |
| <b>CD4</b>    | FITC             | eBioscience    | RM4-5        | Flowcytometry      |
| <b>CD4</b>    | PE               | eBioscience    | RM4-5        | Flowcytometry      |
| <b>CD4</b>    | PerCP-Cy5.5      | eBioscience    | RM4-5        | Flowcytometry      |
| <b>CD5</b>    | PE               | eBioscience    | 53-7.3       | Flowcytometry      |
| <b>CD8a</b>   | FITC             | eBioscience    | Ly-2         | Flowcytometry      |
| <b>CD8</b>    | PE               | eBioscience    | Ly-2         | Flowcytometry      |
| <b>CD8a</b>   | PE-Cy7           | eBioscience    | 53-6.7       | Flowcytometry      |
| <b>CD11b</b>  | APC              | eBioscience    | M1/70        | Flowcytometry      |
| <b>CD11b</b>  | PE               | eBioscience    | M1/70        | Flowcytometry      |
| <b>CD11c</b>  | BV786            | BD Biosciences | HL3          | Flowcytometry      |
| <b>CD11c</b>  | PE               | eBioscience    | N418         | Flowcytometry      |
| <b>CD19</b>   | AF700            | eBioscience    | eBio1D3      | Flowcytometry      |
| <b>CD19</b>   | APC-ef780        | eBioscience    | 1D3          | Flowcytometry      |
| <b>CD19</b>   | PE               | BD Biosciences | 1D3          | Flowcytometry      |
| <b>CD25</b>   | PE-Cy7           | eBioscience    | PC61.5       | Flowcytometry      |
| <b>CD25</b>   | PerCP-Cy5.5      | eBioscience    | PC61.5       | Flowcytometry      |
| <b>CD44</b>   | APC              | BD Biosciences | IM7          | Flowcytometry      |
| <b>CD44</b>   | APC-Cy7          | BD Biosciences | IM7          | Flowcytometry      |
| <b>CD44</b>   | FITC             | eBioscience    | IM7          | Flowcytometry      |
| <b>CD44</b>   | PerCP-Cy5.5      | eBioscience    | IM7          | Flowcytometry      |
| <b>CD62L</b>  | APC              | eBioscience    | MEL-14       | Flowcytometry      |
| <b>CD127</b>  | e450             | eBioscience    | A7R34        | Flowcytometry      |
| <b>CD127</b>  | PE-Cy7           | eBioscience    | A7R34        | Flowcytometry      |

|                        |             |                              |              |               |
|------------------------|-------------|------------------------------|--------------|---------------|
| <b>CXCR4</b>           | APC         | BD Biosciences               | 2B11         | Flowcytometry |
| <b>FcεRIα</b>          | PE          | eBioscience                  | MAR-1        | Flowcytometry |
| <b>Foxp3</b>           | AF488       | eBioscience                  | FJK-16s      | Flowcytometry |
| <b>Foxp3</b>           | PE-Cy7      | eBioscience                  | FJK-16s      | Flowcytometry |
| <b>Gata3</b>           | ef660       | eBioscience                  | TWAJ-14      | Flowcytometry |
| <b>IFN-γ</b>           | BV650       | BD Biosciences               | XMG1.2       | Flowcytometry |
| <b>IFN-γ</b>           | e450        | eBioscience                  | XMG1.2       | Flowcytometry |
| <b>IFN-γ</b>           | PE-Cy7      | eBioscience                  | XMG1.2       | Flowcytometry |
| <b>IL-4</b>            | BV711       | BD Biosciences               | 11B11        | Flowcytometry |
| <b>IL-4</b>            | PE          | BD Biosciences               | 11B11        | Flowcytometry |
| <b>IL-5</b>            | APC         | BD Biosciences               | TRFK-5       | Flowcytometry |
| <b>IL-5</b>            | PE          | BD Biosciences               | TRFK-5       | Flowcytometry |
| <b>IL-5</b>            | Biotin      | BD Biosciences               | TRFK4        | Flowcytometry |
| <b>IL-9</b>            | PE          | BD Biosciences               | D9302C12     | Flowcytometry |
| <b>IL-10</b>           | AF488       | eBioscience                  | JES5-16E3    | Flowcytometry |
| <b>IL-10</b>           | PerCP-Cy5.5 | eBioscience                  | JES5-16E3    | Flowcytometry |
| <b>IL-13</b>           | ef450       | eBioscience                  | eBio13A      | Flowcytometry |
| <b>IL-13</b>           | ef660       | eBioscience                  | eBio13A      | Flowcytometry |
| <b>IL-17A</b>          | AF700       | BD Biosciences               | TC11-18H10.1 | Flowcytometry |
| <b>Live/Dead</b>       | Amcyan      | Invitrogen                   |              | Flowcytometry |
| <b>Ly-6A/Ly-6E</b>     | BV786       | BD Biosciences               | D7           | Flowcytometry |
| <b>Ly-6G</b>           | PE-Cy7      | BD Biosciences               | 1A8          | Flowcytometry |
| <b>Ly-6C/Ly-6G</b>     | APC-ef780   | eBioscience                  | RB6-8C5      | Flowcytometry |
| <b>Ly-6C/Ly-6G</b>     | PE          | eBioscience                  | RB6-8C5      | Flowcytometry |
| <b>MHC class II</b>    | AF700       | eBioscience                  | M5/114.15.3  | Flowcytometry |
| <b>NK1.1</b>           | Horizon 450 | BD Biosciences               | PK136        | Flowcytometry |
| <b>NK1.1</b>           | PE          | eBioscience                  | PK136        | Flowcytometry |
| <b>Roryt</b>           | PE          | BD Biosciences               | Q31-378      | Flowcytometry |
| <b>Siglec-F</b>        | PE          | BD Biosciences               | E50-2440     | Flowcytometry |
| <b>Streptavidin</b>    | APC-ef780   | eBioscience                  |              | Flowcytometry |
| <b>Streptavidin</b>    | BV711       | BD Biosciences               |              | Flowcytometry |
| <b>Streptavidin</b>    | BV785       | BD Biosciences               |              | Flowcytometry |
| <b>Streptavidin</b>    | PE-Cy7      | eBioscience                  |              | Flowcytometry |
| <b>T1/ST2 (IL-33R)</b> | Biotin      | mdbiosciences, Zürich, Swiss | DJ8          | Flowcytometry |
| <b>T1/ST2 (IL-33R)</b> | FITC        | mdbiosciences                | DJ8          | Flowcytometry |

|                                          |           |                |            |               |
|------------------------------------------|-----------|----------------|------------|---------------|
| <b>T-bet</b>                             | BV421     | BD Biosciences | O4-46      | Flowcytometry |
| <b>TCR <math>\alpha</math>2</b>          | APC-Cy7   | BD Biosciences | B20.1      | Flowcytometry |
| <b>TCR <math>\alpha</math>2</b>          | Biotin    | eBioscience    | B20.1      | Flowcytometry |
| <b>TCR <math>\nu\beta</math>5.1, 5.2</b> | Biotin    | BD Biosciences | MR9-4      | Flowcytometry |
| <b>TCR <math>\nu\beta</math>5.1, 5.2</b> | BV785     | BD Biosciences | MR9-4      | Flowcytometry |
| <b>TER-119</b>                           | PE        | eBioscience    | TER119     | Flowcytometry |
| <b>CXCR3</b>                             | BV711     | BD Biosciences | CXCR3-173  | Flowcytometry |
| <b>CXCR5</b>                             | Biotin    | BD Biosciences | 2G8        | Flowcytometry |
| <b>PD-1</b>                              | BV421     | BD Biosciences | J43        | Flowcytometry |
| <b>CD69</b>                              | PE        | eBioscience    | H1.2F3     | Flowcytometry |
| <b>CD103</b>                             | ef450     | eBioscience    | 2E7        | Flowcytometry |
| <b>gp38</b>                              | PE        | Biolegend      | eBio8.1.1  | Flowcytometry |
| <b>CD31</b>                              | FITC      | eBioscience    | 390        | Flowcytometry |
| <b>GL7</b>                               | FITC      | BD Biosciences | GL7        | Flowcytometry |
| <b>CD95</b>                              | PE        | BD Biosciences | Jo2        | Flowcytometry |
| <b>IgD</b>                               | BV711     | BD Biosciences | 11-26c.2a  | Flowcytometry |
| <b>CD3</b>                               | APC-ef780 | eBioscience    | 17A2       | Histology     |
| <b>IgM</b>                               | FITC      | BD Biosciences | II/41      | Histology     |
| <b>GL7</b>                               | FITC      | BD Biosciences | GL7        | Histology     |
| <b>IgD</b>                               | PE        | eBioscience    | 11-26c     | Histology     |
| <b>Goat-anti-rat IgG</b>                 | AP        | CiteAb         | polyclonal | Histology     |
| <b>Goat-anti-FITC IgG</b>                | PO        | Rockland       | polyclonal | Histology     |
| <b>Goat-anti-FITC IgG</b>                | AP        | Rockland       | polyclonal | Histology     |
| <b>Goat-anti-PE IgG</b>                  | PO        | Rockland       | polyclonal | Histology     |

**Supplemental Table 2. RNA-Seq data analysis (see accompanying .xlsx file)**
